# Supplementary material for: Microbiota compositions from infertile couples seeking in vitro fertilization (IVF), using 16S rRNA gene sequencing methods: any correlation to clinical outcomes?
Source: bioRxiv or medRxiv preprint supplement (doi:10.1101/2020.10.22.20215988), 2020-10-26
Supplement: Supplementary file [file media-2.pdf]

**Table S1:**

| <b>Gene Ortholog</b> | <b>Metabolic Functional Gene Definition</b>                                  | <b>LDA effect size</b> | <b>p-value</b> | <b>p-value (FDR)</b> | <b>Normospermia without leucocytes</b> | <b>Semen with Leukocytes</b> |
|----------------------|------------------------------------------------------------------------------|------------------------|----------------|----------------------|----------------------------------------|------------------------------|
| K02025               | multiple sugar transport system permease protein                             | 2.261725843            | 0.012724       | 0.012752175          | 0.064354389                            | 0.100693286                  |
| K00557               | tRNA (uracil-5-)-methyltransferase                                           | 1.874490605            | 0.012724       | 0.012758059          | 0.015985129                            | 0.001204857                  |
| K16087               | hemoglobin/transferrin/lactoferrin receptor protein                          | 2.070152298            | 0.01991        | 0.020019188          | 0.025014425                            | 0.001708239                  |
| K02119               | V/A-type H <sup>+</sup> /Na <sup>+</sup> -transporting ATPase subunit C      | 1.710055455            | 0.024682       | 0.024843508          | 0.002815807                            | 0.012874332                  |
| K10806               | acyl-CoA thioesterase YciA                                                   | 1.841834075            | 0.030413       | 0.030660244          | 0.017565963                            | 0.003870828                  |
| K07783               | MFS transporter, OPA family, sugar phosphate sensor protein UhpC             | 1.722774099            | 0.030413       | 0.030702979          | 0.011095006                            | 0.000731635                  |
| K02122               | V/A-type H <sup>+</sup> /Na <sup>+</sup> -transporting ATPase subunit F      | 1.697757071            | 0.030413       | 0.030712492          | 0.00294449                             | 0.012716599                  |
| K01995               | branched-chain amino acid transport system ATP-binding protein               | 2.209931713            | 0.037253       | 0.037677881          | 0.09816811                             | 0.130399195                  |
| K03808               | paraquat-inducible protein A                                                 | 1.69974082             | 0.037253       | 0.037698353          | 0.010599677                            | 0.000781914                  |
| K03576               | LysR family transcriptional regulator, regulator for metE and metH           | 1.87590023             | 0.037253       | 0.03770128           | 0.019489044                            | 0.004660097                  |
| K03604               | LacI family transcriptional regulator, purine nucleotide synthesis repressor | 1.949109778            | 0.045361       | 0.046168073          | 0.027013054                            | 0.009424649                  |
| K02806               | PTS system, nitrogen regulatory IIA component                                | 1.980305469            | 0.045361       | 0.046186102          | 0.026697121                            | 0.007783834                  |
| K03583               | exodeoxyribonuclease V gamma subunit                                         | 1.886805413            | 0.045361       | 0.046240272          | 0.019449782                            | 0.004238622                  |
| K02453               | general secretion pathway protein D                                          | 1.818376563            | 0.045361       | 0.046247505          | 0.017774012                            | 0.004809466                  |

Table S2:

| <b>Taxon name</b>           | <b>LDA effect size</b> | <b>p-value</b> | <b>p-value (FDR)</b> | <b>Semen positive IVF clinical outcome</b> | <b>Vagina positive IVF clinical outcome</b> |
|-----------------------------|------------------------|----------------|----------------------|--------------------------------------------|---------------------------------------------|
| Firmicutes                  | 5.09401                | 0.02782        | 0.03009              | 56.34075                                   | 81.17426                                    |
| Bacilli                     | 5.21938                | 0.01975        | 0.02116              | 47.3827                                    | 80.52727                                    |
| Lactobacillales             | 5.33029                | 0.00949        | 0.00997              | 37.4993                                    | 80.28656                                    |
| Lactobacillaceae            | 5.18136                | 0.04121        | 0.04617              | 32.84479                                   | 63.21107                                    |
| Lactobacillus               | 5.18089                | 0.04121        | 0.04624              | 32.83665                                   | 63.16992                                    |
| Actinobacteria              | 4.94624                | 0.00783        | 0.00817              | 22.27609                                   | 4.60474                                     |
| Actinobacteria_c            | 4.96207                | 0.00428        | 0.0044               | 22.04688                                   | 3.71965                                     |
| Corynebacteriales           | 4.84637                | 0.00643        | 0.00666              | 14.81763                                   | 0.7768                                      |
| Corynebacteriaceae          | 4.84196                | 0.00643        | 0.00667              | 14.65991                                   | 0.76095                                     |
| Corynebacterium             | 4.84186                | 0.00949        | 0.00999              | 14.64746                                   | 0.75181                                     |
| Bacillales                  | 4.68318                | 0.00783        | 0.00818              | 9.8834                                     | 0.2407                                      |
| Staphylococcaceae           | 4.6722                 | 0.01137        | 0.012                | 9.62297                                    | 0.22106                                     |
| Staphylococcus              | 4.67058                | 0.00776        | 0.00809              | 9.57409                                    | 0.20708                                     |
| Staphylococcus aureus group | 4.61706                | 0.01137        | 0.01201              | 8.48793                                    | 0.20708                                     |
| Bacteroidetes               | 4.58572                | 0.00134        | 0.00136              | 7.71487                                    | 0.01044                                     |
| Bacteroidia                 | 4.58477                | 0.0017         | 0.00173              | 7.69734                                    | 0.00978                                     |
| Bacteroidales               | 4.58477                | 0.0017         | 0.00174              | 7.69734                                    | 0.00978                                     |
| Proteobacteria              | 4.29491                | 0.00949        | 0.00996              | 6.98912                                    | 10.93298                                    |
| Corynebacterium_uc          | 4.47953                | 0.01549        | 0.01653              | 6.16697                                    | 0.13377                                     |
| Porphyromonadaceae          | 4.44654                | 0.04929        | 0.05568              | 5.59843                                    | 0.00656                                     |
| Porphyromonas               | 4.44654                | 0.04929        | 0.05576              | 5.59843                                    | 0.00656                                     |
| Gammaproteobacteria         | 4.43926                | 0.01369        | 0.01448              | 5.31457                                    | 10.81351                                    |
| Negativicutes               | 4.38691                | 0.03556        | 0.03956              | 5.14508                                    | 0.27072                                     |
| Veillonellales              | 4.38553                | 0.04183        | 0.04699              | 5.12968                                    | 0.27072                                     |
| Veillonellaceae             | 4.38553                | 0.04183        | 0.04706              | 5.12968                                    | 0.27072                                     |

|                                   |         |         |         |         |         |
|-----------------------------------|---------|---------|---------|---------|---------|
| Veillonella                       | 4.35812 | 0.00142 | 0.00144 | 4.58879 | 0.02708 |
| Pasteurellales                    | 4.21005 | 0.00685 | 0.00711 | 3.24644 | 0.00264 |
| Pasteurellaceae                   | 4.21005 | 0.00685 | 0.00712 | 3.24644 | 0.00264 |
| Haemophilus                       | 4.20881 | 0.00685 | 0.00713 | 3.23717 | 0.00264 |
| Haemophilus parainfluenzae group  | 4.20555 | 0.00576 | 0.00596 | 3.21037 | 0       |
| Micrococcales                     | 4.15838 | 0.00039 | 0.00039 | 3.00235 | 0.12248 |
| Tissierellia                      | 4.04951 | 0.00181 | 0.00185 | 2.58313 | 0.34196 |
| Tissierellales                    | 4.04951 | 0.00181 | 0.00185 | 2.58313 | 0.34196 |
| Peptoniphilaceae                  | 4.04951 | 0.00181 | 0.00185 | 2.58313 | 0.34196 |
| Corynebacterium diphtheriae group | 4.03548 | 0.02629 | 0.02836 | 2.29907 | 0.12913 |
| Prevotellaceae                    | 4.00565 | 0.01103 | 0.01162 | 2.02863 | 0.00267 |
| Prevotella                        | 4.00166 | 0.03293 | 0.03659 | 2.01009 | 0.00267 |
| KV793764_s                        | 3.97497 | 0.03181 | 0.03497 | 1.8878  | 0       |
| Corynebacterium confusum          | 3.94526 | 0.04901 | 0.05529 | 1.79477 | 0.03182 |
| Micrococcaceae                    | 3.77796 | 0.00124 | 0.00126 | 1.24546 | 0.0462  |
| Pseudomonadales                   | 3.72559 | 0.00086 | 0.00087 | 1.07523 | 0.0123  |
| Staphylococcus succinus group     | 3.72754 | 0.01393 | 0.01481 | 1.06775 | 0       |
| Clostridia                        | 3.67147 | 0.03701 | 0.04123 | 0.97261 | 0.03431 |
| Clostridiales                     | 3.67147 | 0.03701 | 0.04129 | 0.97261 | 0.03431 |
| Betaproteobacteria                | 3.61248 | 0.00027 | 0.00027 | 0.92971 | 0.11096 |
| Moraxellaceae                     | 3.64364 | 0.00086 | 0.00087 | 0.89077 | 0.01068 |
| Propionibacteriales               | 3.61278 | 0.00005 | 0.00005 | 0.82203 | 0.00235 |
| Propionibacteriaceae              | 3.60485 | 0.00005 | 0.00005 | 0.80718 | 0.00235 |
| Acinetobacter                     | 3.58208 | 0.00328 | 0.00336 | 0.77442 | 0.01068 |
| Cutibacterium                     | 3.57999 | 0.00004 | 0.00004 | 0.76044 | 0.00038 |
| Burkholderiales                   | 3.49195 | 0.00035 | 0.00035 | 0.72768 | 0.10832 |
| Fingoldia                         | 3.48308 | 0.00112 | 0.00113 | 0.71095 | 0.10429 |
| Brevibacteriaceae                 | 3.51418 | 0.02031 | 0.02184 | 0.69968 | 0.04665 |
| Brevibacterium                    | 3.51418 | 0.02031 | 0.02187 | 0.69968 | 0.04665 |
| Prevotella timonensis             | 3.52223 | 0.04039 | 0.04519 | 0.66734 | 0.00224 |

|                                  |         |         |         |         |         |
|----------------------------------|---------|---------|---------|---------|---------|
| Cutibacterium acnes group        | 3.52039 | 0.00002 | 0.00002 | 0.66262 | 0       |
| Fingoldia magna                  | 3.4283  | 0.00088 | 0.00089 | 0.63434 | 0.10011 |
| Comamonadaceae                   | 3.42454 | 0.00344 | 0.00353 | 0.5877  | 0.05745 |
| Rothia                           | 3.46403 | 0.03293 | 0.03654 | 0.58267 | 0.00076 |
| Dermabacteraceae                 | 3.38255 | 0.00516 | 0.00531 | 0.49778 | 0.0156  |
| Veillonella ratti group          | 3.34061 | 0.03181 | 0.03492 | 0.4378  | 0       |
| Delftia                          | 3.25927 | 0.0194  | 0.02073 | 0.39414 | 0.03163 |
| Delftia tsuruhatensis group      | 3.25927 | 0.0194  | 0.02076 | 0.39414 | 0.03163 |
| Microbacteriaceae                | 3.2494  | 0.00588 | 0.00608 | 0.36765 | 0.01404 |
| Micrococcus luteus group         | 3.23728 | 0.04039 | 0.04513 | 0.34509 | 0.00016 |
| Acinetobacter haemolyticus group | 3.05244 | 0.03181 | 0.03464 | 0.22508 | 0       |
| Actinomycetales                  | 2.98079 | 0.00878 | 0.00919 | 0.19705 | 0.01071 |
| Actinomycetaceae                 | 2.98079 | 0.00878 | 0.00921 | 0.19705 | 0.01071 |
| Zimmermannella                   | 2.95452 | 0.03181 | 0.03459 | 0.17955 | 0       |
| Zimmermannella bifida            | 2.95452 | 0.03181 | 0.03487 | 0.17955 | 0       |
| Veillonella dispar               | 2.93584 | 0.01393 | 0.01483 | 0.17069 | 0       |
| Streptomycetales                 | 2.92707 | 0.03181 | 0.03445 | 0.16874 | 0       |
| Streptomycetaceae                | 2.92707 | 0.03181 | 0.0345  | 0.16874 | 0       |
| Streptomyces                     | 2.92707 | 0.03181 | 0.03454 | 0.16874 | 0       |
| Yersiniaceae                     | 2.72263 | 0.02734 | 0.02953 | 0.1372  | 0.03354 |
| Intrasporangiaceae               | 2.8171  | 0.01393 | 0.01475 | 0.12868 | 0       |
| Brachybacterium                  | 2.81245 | 0.00543 | 0.00559 | 0.12776 | 0.00153 |
| Brachybacterium faecium group    | 2.81385 | 0.00543 | 0.0056  | 0.12776 | 0.00131 |
| Actinomyces                      | 2.8047  | 0.04552 | 0.05129 | 0.12566 | 0.00961 |
| Enhydrobacter                    | 2.76726 | 0.01393 | 0.01477 | 0.11636 | 0       |
| Enhydrobacter aerosaccus group   | 2.76726 | 0.01393 | 0.01479 | 0.11636 | 0       |
| Yersinia                         | 2.7521  | 0.01978 | 0.02122 | 0.11307 | 0.00568 |
| Yersinia pestis group            | 2.7521  | 0.01978 | 0.02124 | 0.11307 | 0.00568 |
| Pseudomonas stutzeri group       | 2.63966 | 0.03181 | 0.03478 | 0.08686 | 0       |
| Mobiluncus                       | 2.55388 | 0.03181 | 0.03506 | 0.07139 | 0       |

|                              |         |         |         |         |         |
|------------------------------|---------|---------|---------|---------|---------|
| Mobiluncus curtisii group    | 2.55388 | 0.03181 | 0.03511 | 0.07139 | 0       |
| Acinetobacter junii group    | 2.56823 | 0.03181 | 0.03501 | 0.06841 | 0       |
| Brevibacterium iodinum group | 2.43642 | 0.03181 | 0.03468 | 0.05228 | 0       |
| Cutibacterium granulosum     | 2.32763 | 0.03181 | 0.03473 | 0.041   | 0       |
| Ralstonia syzygii group      | 2.56562 | 0.03181 | 0.03482 | 0.01404 | 0       |
| Lactobacillus_uc             | 3.46664 | 0.00174 | 0.00178 | 0.01318 | 0.59829 |
| Streptococcus agalactiae     | 4.63698 | 0.01393 | 0.01485 | 0       | 8.6695  |
| Anaerococcus vaginalis group | 2.12563 | 0.03181 | 0.0352  | 0       | 0.02547 |

**Table S3:**

| <b>Gene Ortholog</b> | <b>Definition</b>                                   | <b>LDA effect size</b> | <b>p-value</b> | <b>p-value (FDR)</b> | <b>Semen positive IVF clinical outcome</b> | <b>Semen negative IVF clinical outcome</b> |
|----------------------|-----------------------------------------------------|------------------------|----------------|----------------------|--------------------------------------------|--------------------------------------------|
| K01972               | DNA ligase (NAD+)                                   | 2.127514               | 0.025784       | 0.027006             | 0.14999749                                 | 0.123372278                                |
| K03111               | single-strand DNA-binding protein                   | 1.989716               | 0.047509       | 0.051646             | 0.11392864                                 | 0.094596717                                |
| K02342               | DNA polymerase III subunit epsilon                  | 2.237197               | 0.020776       | 0.021533             | 0.113473107                                | 0.079140673                                |
| K03466               | DNA segregation ATPase FtsK/SpoIIIE, S-DNA-T family | 2.047748               | 0.013243       | 0.013504             | 0.107140416                                | 0.085016167                                |
| K01890               | phenylalanyl-tRNA synthetase beta chain             | 2.084727               | 0.023163       | 0.02414              | 0.100749475                                | 0.076641049                                |
| K02335               | DNA polymerase I                                    | 2.108086               | 0.002953       | 0.002964             | 0.10072175                                 | 0.075270088                                |
| K01265               | methionyl aminopeptidase                            | 1.987601               | 0.023163       | 0.024148             | 0.10020196                                 | 0.080964916                                |
| K01462               | peptide deformylase                                 | 1.990179               | 0.043071       | 0.046367             | 0.09983316                                 | 0.080480433                                |
| K07042               | probable rRNA maturation factor                     | 2.015016               | 0.038989       | 0.041653             | 0.099490781                                | 0.078987216                                |
| K02033               | peptide/nickel transport system permease protein    | 2.129036               | 0.013243       | 0.013497             | 0.098642617                                | 0.071923204                                |
| K00655               | 1-acyl-sn-glycerol-3-phosphate acyltransferase      | 2.028256               | 0.038989       | 0.041735             | 0.095686398                                | 0.074541928                                |
| K03070               | preprotein translocase subunit SecA                 | 1.942646               | 0.020776       | 0.021523             | 0.094463108                                | 0.077137421                                |
| K03177               | tRNA pseudouridine55 synthase                       | 2.079707               | 0.043071       | 0.046331             | 0.092473783                                | 0.068644748                                |
| K04077               | chaperonin GroEL                                    | 2.139938               | 0.028658       | 0.030169             | 0.089787416                                | 0.062383681                                |
| K07058               | membrane protein                                    | 2.047924               | 0.014856       | 0.015206             | 0.082515965                                | 0.060382606                                |
| K03665               | GTPase                                              | 1.899305               | 0.03524        | 0.037399             | 0.082092403                                | 0.066431247                                |
| K01772               | protoporphyrin/coproporphyrin ferrochelatase        | 2.052958               | 0.020776       | 0.021517             | 0.074863913                                | 0.052470186                                |
| K03327               | multidrug resistance protein, MATE family           | 2.203422               | 0.047509       | 0.051642             | 0.073717078                                | 0.105465668                                |
| K01239               | purine nucleosidase                                 | 2.108919               | 0.043071       | 0.046305             | 0.073311234                                | 0.047810338                                |

|        |                                                                                                |          |          |          |             |             |
|--------|------------------------------------------------------------------------------------------------|----------|----------|----------|-------------|-------------|
| K02483 | two-component system, OmpR family, response regulator                                          | 2.047107 | 0.03524  | 0.037454 | 0.07263009  | 0.050538717 |
| K00626 | acetyl-CoA C-acetyltransferase                                                                 | 1.99962  | 0.03524  | 0.037419 | 0.069818706 | 0.05003624  |
| K00036 | glucose-6-phosphate 1-dehydrogenase                                                            | 1.975893 | 0.03524  | 0.037469 | 0.066485462 | 0.047765376 |
| K09167 | uncharacterized protein                                                                        | 2.046138 | 0.038989 | 0.041791 | 0.045411383 | 0.023369705 |
| K02021 | putative ABC transport system ATP-binding protein                                              | 1.958238 | 0.023163 | 0.024076 | 0.041531088 | 0.023564754 |
| K06919 | putative DNA primase/helicase                                                                  | 2.013319 | 0.028658 | 0.03016  | 0.037171357 | 0.057594173 |
| K00656 | formate C-acetyltransferase                                                                    | 2.070174 | 0.014856 | 0.015198 | 0.032817127 | 0.056124477 |
| K02022 | HlyD family secretion protein                                                                  | 1.827474 | 0.025784 | 0.026946 | 0.032391741 | 0.019148527 |
| K00847 | fructokinase                                                                                   | 1.932501 | 0.011787 | 0.011997 | 0.031899598 | 0.048820644 |
| K07665 | two-component system, OmpR family, copper resistance phosphate regulon response regulator CusR | 1.979416 | 0.025784 | 0.026969 | 0.030221569 | 0.049095685 |
| K07636 | two-component system, OmpR family, phosphate regulon sensor histidine kinase PhoR              | 1.949764 | 0.047509 | 0.051486 | 0.030145419 | 0.047760752 |
| K18851 | diacylglycerol O-acyltransferase / trehalose O-mycolyltransferase                              | 1.973155 | 0.049845 | 0.054394 | 0.028820919 | 0.010219762 |
| K00128 | aldehyde dehydrogenase (NAD+)                                                                  | 1.915927 | 0.043071 | 0.046312 | 0.028683223 | 0.012403259 |
| K04069 | pyruvate formate lyase activating enzyme                                                       | 2.149586 | 0.006432 | 0.006486 | 0.027926333 | 0.055950172 |
| K05568 | multicomponent Na <sup>+</sup> :H <sup>+</sup> antiporter subunit D                            | 1.927471 | 0.043071 | 0.04632  | 0.024558915 | 0.007835    |
| K05569 | multicomponent Na <sup>+</sup> :H <sup>+</sup> antiporter subunit E                            | 1.921343 | 0.038989 | 0.04163  | 0.024144598 | 0.00765781  |
| K05571 | multicomponent Na <sup>+</sup> :H <sup>+</sup> antiporter subunit G                            | 1.910777 | 0.038989 | 0.041709 | 0.023648463 | 0.007562758 |
| K05565 | multicomponent Na <sup>+</sup> :H <sup>+</sup> antiporter subunit A                            | 1.916768 | 0.043071 | 0.046422 | 0.023639464 | 0.007327532 |
| K05570 | multicomponent Na <sup>+</sup> :H <sup>+</sup> antiporter subunit F                            | 1.901026 | 0.038989 | 0.041657 | 0.023096116 | 0.007371991 |

|        |                                                                           |          |          |          |             |             |
|--------|---------------------------------------------------------------------------|----------|----------|----------|-------------|-------------|
| K00516 | lytic starch monooxygenase                                                | 1.907872 | 0.016639 | 0.017078 | 0.022382885 | 0.006405736 |
| K07741 | anti-repressor protein                                                    | 1.996787 | 0.016639 | 0.017098 | 0.021925715 | 0.04157828  |
| K05567 | multicomponent Na <sup>+</sup> :H <sup>+</sup> antiporter subunit C       | 1.852899 | 0.03524  | 0.037498 | 0.021176543 | 0.007122792 |
| K17883 | mycothione reductase                                                      | 1.837484 | 0.031803 | 0.033602 | 0.020921679 | 0.007364984 |
| K07007 | 3-dehydro-bile acid Delta4,6-reductase                                    | 1.884045 | 0.031803 | 0.033694 | 0.020019634 | 0.035133099 |
| K06871 | uncharacterized protein                                                   | 2.007904 | 0.020776 | 0.021548 | 0.019971188 | 0.040138492 |
| K14059 | integrase                                                                 | 2.082284 | 0.043071 | 0.046316 | 0.019184477 | 0.043156532 |
| K07175 | PhoH-like ATPase                                                          | 1.854199 | 0.016639 | 0.017104 | 0.019145187 | 0.00504872  |
| K04758 | ferrous iron transport protein A                                          | 1.861288 | 0.028658 | 0.03012  | 0.01836619  | 0.032697865 |
| K03737 | pyruvate-ferredoxin/flavodoxin oxidoreductase                             | 1.871032 | 0.023163 | 0.024091 | 0.018221391 | 0.032882862 |
| K11904 | type VI secretion system secreted protein VgrG                            | 2.217267 | 0.013243 | 0.013514 | 0.017533436 | 0.050316935 |
| K07089 | uncharacterized protein                                                   | 1.82063  | 0.020776 | 0.021518 | 0.013720232 | 0.026753276 |
| K19337 | RpiR family transcriptional regulator, carbohydrate utilization regulator | 2.090217 | 0.028658 | 0.030141 | 0.013489406 | 0.037907035 |
| K12678 | autotransporter family porin                                              | 1.967311 | 0.014856 | 0.015204 | 0.013421248 | 0.031771107 |
| K07484 | transposase                                                               | 2.53569  | 0.031803 | 0.033681 | 0.010953154 | 0.079415756 |
| K09812 | cell division transport system ATP-binding protein                        | 1.848876 | 0.011787 | 0.011989 | 0.009325629 | 0.023247895 |
| K08978 | bacterial/archaeal transporter family protein                             | 1.899764 | 0.008234 | 0.008326 | 0.009106418 | 0.024784274 |
| K00651 | homoserine O-succinyltransferase/O-acetyltransferase                      | 1.881026 | 0.002953 | 0.002963 | 0.008456631 | 0.023464036 |
| K20861 | FMN hydrolase / 5-amino-6-(5-phospho-D-ribitylamino)uracil phosphatase    | 2.063187 | 0.011787 | 0.011993 | 0.007491599 | 0.030423796 |
| K04027 | ethanolamine utilization protein EutM                                     | 1.81211  | 0.002579 | 0.002588 | 0.002144374 | 0.014920324 |
